# Supplementary material for: Serotonin Signalling in Flatworms: An Immunocytochemical Localisation of 5-HT7 Type of Serotonin Receptors in Opisthorchis felineus and Hymenolepis diminuta
Source: MDPI journal article supplement (doi:10.3390/biom11081212), 2021-08-15
Supplement: s1 [file s1]

# Supplementary Material

|                         |                                                                |     |
|-------------------------|----------------------------------------------------------------|-----|
| Opisthorchis viverrini  | -----MLRGE                                                     | 5   |
| Homo sapiens            | MPDVNSGRPOLYGHLSRFLP-----EVRGLPDLSPDGGADPVAGSNAPHLSS--         | 50  |
| Mus musculus            | MPDVNSGRPOLYGHLSRLIP-----EVRRLQDLSPDGGAGVSVSMHLLSG--           | 51  |
| Hymenolepis diminuta    | -----MAS--QQNDP-LTFKFW-----GE                                  | 16  |
| Hymenolepis microstoma  | -----MAS--QQNDP-LTFKSW-----GE                                  | 16  |
| Echinococcus granulosus | -----MAS--QLNDPSITFKAWG--SE                                    | 19  |
| Mesocostoides corti     | -----MAT--QLNDPSITFKAWG--SE                                    | 19  |
| Taenia asiatica         | -----                                                          | 0   |
| Dugesia japonica        | -----MSTINST                                                   | 7   |
| Schmidtea mediterranea  | -----MSTYNSS                                                   | 7   |
| Clonorchis sinensis     | -----MISAAIILFQSVLSGADKLITVSDGEPDQFIRSHPI---DR                 | 41  |
| Fasciola hepatica       | -----MTDKDIISVSTHFSYQFSPNMTLSMFOF                              | 29  |
| Schistosoma mansoni     | -----NT                                                        | 2   |
| Schistosoma japonicum   | -----MKYIPLSYKHSFKSLTYLF-----FVNTLTITWN---ALNVPDWIVEERDLT      | 46  |
| Opisthorchis viverrini  | AF-----DQFEAKRSSNGTSEQLSQIFKGLCFLSILFAALFGNAL                  | 46  |
| Homo sapiens            | -----EVTASAPMTDAPPDMSGCG-E--QINYGREKVVIGSILTLTLTIAGNCL         | 101 |
| Mus musculus            | -----FPEVTASAPMTDAPPDMSGCG-E--QINYGREKVVIGSILTLTLTIAGNCL       | 104 |
| Hymenolepis diminuta    | NCPSLWGLLANGSIT-----QDQFLSCK--PQVDIGVGKVLTVLLSILLGTAGGNIL      | 69  |
| Hymenolepis microstoma  | NCTSLWELANGSIT-----KDQFLGCK--PQVDIGVGKVLTVLLSILLGTAGGNIL       | 69  |
| Echinococcus granulosus | NCTLLDLINRSTP-----EEAFLAACK--PHADIVKSIILATVLLGLLTAGGNIL        | 72  |
| Mesocostoides corti     | NCTLLDLQVNRITIS-----EAFLEACK--PHADIDAGTVLAILTLTLGTAGGNIL       | 72  |
| Taenia asiatica         | -----NDAMPSTYLAATQ--ILSAAAPGSPLAVTFCTITAILTGHTLL               | 43  |
| Dugesia japonica        | NCTFYQLASKNN--S--AKQVP--FYCKF--SF--EF--EFLIIVLTFVLTAGGNIL      | 57  |
| Schmidtea mediterranea  | NCTLYQLASNSNIN--ALQVP--FYCKF--SF--DF--EFLIIVTFVLTAGGNIL        | 58  |
| Clonorchis sinensis     | MRLVLA--TEHHNIG--HGN--ITHMT--AYSPAI--SAILSLILPSTAVATIGGNFL     | 91  |
| Fasciola hepatica       | --RPTF--SSLSMAVIEP--WCISD--SYTPV--SGVIGFILVLAIGTAGGNFL         | 78  |
| Schistosoma mansoni     | ISQLDN--SSIKSTLS--MNSNT--SECTSE--NDSVLI--TGITFILSLVLAIGTAGGNFL | 55  |
| Schistosoma japonicum   | APQLTI--SNHSTLS--VNHSSN--TECTSE--NTSASV--TGITFILSLVLAIGTAGGNFL | 99  |
| Opisthorchis viverrini  | VFIAVQRFERLRVKTNIFLVSAMADFLVALVWMPFSACMSLHNGRWTFGNFCDVFNA      | 106 |
| Homo sapiens            | VTSVCVFVKLR--QPSNYLTVSLALADLSVAVAMPFVSVDLIGRWTFGHFCHVITA       | 160 |
| Mus musculus            | VWISCVFVKLR--QPSNYLTVSLALADLSVAVAMPFVSVDLIGRWTFGHFCHVITA       | 163 |
| Hymenolepis diminuta    | VIIATLIVKLR--SPTNLLIVLAVDTFLVSLVLPFAIAY--QIFEYWPQQAICDLYSI     | 127 |
| Hymenolepis microstoma  | VIIATLIVKLR--SPTNLLIVLAVDTFMVSLVLPFAIAY--QIFEYWPQQAICDLYSI     | 127 |
| Echinococcus granulosus | VIIATLIVKLR--SPTNLLIVLAVDTFLVSLVLPFAIAY--QILGYWPFNQICDLYSI     | 130 |
| Mesocostoides corti     | VIIATLIVKLR--SPTNLLIVLAVDTFLVSLVLPFAIAY--QILGYWPFNQICDLYSI     | 130 |
| Taenia asiatica         | VISAVLWVKLR--CPSNFLIVSLAASDLVSTVMPFSYL--EYRGVGLGEVACDIFI       | 101 |
| Dugesia japonica        | VISSVAIVKLR--TSSNFLIVLACDPLVSLVLPFAVHQVYRGQWPFSEILCDIFIS       | 116 |
| Schmidtea mediterranea  | VIMSVAIVKLR--TPSNFLIVLACDPLVSLVLPFAVHQVYRGQWPFSEILCDIFIS       | 117 |
| Clonorchis sinensis     | VILAVTLVKLR--TPSNILTVSLAFSDFVGLVLPFAIAD--LLKGWPFNIEPLCDYIS     | 149 |
| Fasciola hepatica       | VILAVTLVKLR--TPSNILTVSLAFSDFVGLVLPFAIAD--ALKGYWPFNIEPLCDYIS    | 136 |
| Schistosoma mansoni     | VILAVTLVKLR--TPSNILTVSLAFSDFVGLVLPFAIAD--ALQGYWPFNIEPLCDYIS    | 113 |
| Schistosoma japonicum   | VILAVTLVKLR--TPSNILTVSLAFSDFVGLVLPFAIAD--ALQGYWPFNIEPLCDYIS    | 157 |
| Opisthorchis viverrini  | NDVLFSTASILHLCCISMERYATINPLSYDRKHTKSRVTLMTTWTLSILSYLPIMS       | 166 |
| Homo sapiens            | MDVNCCTASIMTLVCSIDRYLGITRPLTPYPRQNGKCAKMLSVALLSASITLPLFG       | 220 |
| Mus musculus            | MDVNCCTASIMTLVCSIDRYLGITRPLTPYPRQNGKCAKMLSVALLSASITLPLFG       | 223 |
| Hymenolepis diminuta    | SDVLLCTLSILSLCTISIDRYMAITKPFQVAPKRTPKRMFIMLISWLLSAAISVSPIFG    | 187 |
| Hymenolepis microstoma  | SDVLLCTLSILSLCTISIDRYMAITKPFQVAPKRTPKRMFIMLISWLLSAAISVSPIFG    | 187 |
| Echinococcus granulosus | SDVLLCTLSILSLCTISIDRYLAITKPLQAAKRTPKRMIMLISWLLSAAISVPPVFG      | 190 |
| Mesocostoides corti     | SDVLLCTLSILSLCTISIDRYLAITKPLQAAKRTPKRMIMLISWLLSAAISVPPVFG      | 190 |
| Taenia asiatica         | FDVLLCTASILNLCAISIDRYLAVTKPFYVYKRTPKRMIMLITFAWSIALISLPPTFG     | 161 |
| Dugesia japonica        | FDVLLCTSSILNLCAISIDRYLITRPLQVAVRTPARITGFWAISWTSALISLPPMFG      | 176 |
| Schmidtea mediterranea  | FDVLLCTSSILNLCAISIDRYLITRPLQVAVRTPARISLWIAWSIALISLPLPFG        | 177 |
| Clonorchis sinensis     | FDVLLCTASILNLCAISIDRYLITRPLTVYSKRTPKRMIAATWISALICLPPNIG        | 209 |
| Fasciola hepatica       | FDVLLCTASILNLCAISIDRYLITRPTVYSRTPCRMAEMIAAAWISALISLPPNIG       | 196 |
| Schistosoma mansoni     | FDVLLCTASILNLCAISIDRYLITKPLTYASRTPCRMAEMIAATWISALISLPPNIG      | 173 |
| Schistosoma japonicum   | FDVLLCTASILNLCAISIDRYLITKPLTYASRTPCRMAEMIAATWISALISLPPNIG      | 217 |
| Opisthorchis viverrini  | GIYTTAEYLAQRGSQHECFVNNIYAVVSSSTSFSTIPSIMVAVVYRIYIEARRQERK      | 226 |
| Homo sapiens            | W-----AQNVDDKVCILSQDGYTYTAVAFYIPHSVMLFHYQIYKAARSAK             | 272 |
| Mus musculus            | W-----AQNVDDKVCILSQDGYTYTAVAFYIPHSVMLFHYQIYKAARSAK             | 275 |
| Hymenolepis diminuta    | W-----EQQN--TPFFCINMMDLTFQIYATLTAFYIPLALMLVYKGLVLAKQIALV       | 238 |
| Hymenolepis microstoma  | W-----EQQN--APFFCINMMDLTFQIYATLTAFYIPLTVMLVYKGLVLAKQMAIA       | 238 |
| Echinococcus granulosus | W-----EQQN--SPFYCGYSEELTYQIYATMTAFYIPLTVMLVYKGLVLAKQMASV       | 241 |
| Mesocostoides corti     | W-----EQQN--SPFYCGYSEELTYQIYATMTAFYIPLTVMLVYKGLVLAKQMAIA       | 241 |
| Taenia asiatica         | F-----KDFE--VPKQCSYQBFYQIYACFAGFYIPLTVMLVYGRIFKLAREMIRS        | 212 |
| Dugesia japonica        | L-----KETF--IPGQCSYSENLTYQIYATFGAFYIPLTVMLVYGRIFKLAREMAQH      | 227 |
| Schmidtea mediterranea  | W-----KETF--IPGQCSYSENLTYQIYATFGAFYIPLTVMLVYGRIFKLAREMAQH      | 228 |
| Clonorchis sinensis     | W-----KSPF--QEGRCESYEDGYQIYATFCAFYIPLTVMLVYKGLIFKLAREMSRN      | 260 |
| Fasciola hepatica       | W-----KTPF--EICKCEYSKNGYQIYATFCAFYIPLTVMLVYGRIFKLAREMSRA       | 247 |
| Schistosoma mansoni     | W-----KDPF--QKCACEYSKNGYQVATFFAFYIPLTVMLVYGRIFKLAREMSRS        | 224 |
| Schistosoma japonicum   | W-----KEPF--QKCACEYSKNGYQVATFFAFYIPLTVMLVYGRIFKLAREMSRS        | 268 |
| Opisthorchis viverrini  | IHLHLKSKLLTSSDATTYTE-----Q-----                                | 249 |
| Homo sapiens            | HKFGPGF---RVEPDS-----                                          | 285 |
| Mus musculus            | HKFGSGP---RVQPES-----                                          | 288 |
| Hymenolepis diminuta    | DAQTRKGSIDTQNRD--SSIPF-----GTCNRRSLYPGDNIC-----                | 275 |
| Hymenolepis microstoma  | DAQTARKSSIDTQNRN--SSLPF-----STDMRRSSLYPPGNIC-----              | 275 |
| Echinococcus granulosus | DAQVGRKGSVDQTQRS--SSIPF-----EWNRRSLVAGSEY-----                 | 275 |
| Mesocostoides corti     | NAQVARESTETQART--SSIPA-----YADNRNLSLYPTRESY-----               | 278 |
| Taenia asiatica         | DRVLPPPTPGDEKRNISIQNVAESQETDEGTSEDKTSLTCFCKICCHYQKRASLDSTD     | 272 |
| Dugesia japonica        | DAKLKIGISPNSSD-----KE-----QH-----                              | 245 |
| Schmidtea mediterranea  | DAKNKIGISPNSSD-----RE--HQ-----                                 | 246 |
| Clonorchis sinensis     | EQRQMPPTQCNMLQHQTSQADQPMIL---N-----SQTL-----                   | 293 |
| Fasciola hepatica       | EQRQMIASSGEVPPGTVTLKEDTIPTPKAD-----HITLY-----QSSAP-----        | 289 |
| Schistosoma mansoni     | GQSKMTAGIS-----                                                | 234 |
| Schistosoma japonicum   | GQSKVTPSTIRKSTGI-----SENVSMNSPVLE-----EK--L-----QRDLQ-----     | 304 |
| Opisthorchis viverrini  | -----PRGS--VEKET-----TVPE-----                                 | 262 |
| Homo sapiens            | -----V-----                                                    | 286 |
| Mus musculus            | -----V-----                                                    | 289 |
| Hymenolepis diminuta    | -----ANSQFNDLKDMN-----DTTAGDAKSQSVSVFSPSPV-----                | 309 |
| Hymenolepis microstoma  | -----ANSQFNDLKDMN-----EGAERGAKSQSVSVFSPSPV-----                | 309 |
| Echinococcus granulosus | -----KASALYPLDKEH-----KGNRGDSKPSQSVSVFSPPTV-----               | 309 |
| Mesocostoides corti     | -----TSQKVYTEANDMWO-----ILEPMTDFKSRQSVSVFSPSPA-----            | 316 |
| Taenia asiatica         | KPVDPMPYINSSLGHSNPTPMVIFISGANDSPRLNPLIKGNICPTVPIHFSRL--PPPK    | 331 |
| Dugesia japonica        | -----SHLR--IVOSHLCNTP-----                                     | 259 |
| Schmidtea mediterranea  | -----PHLR--IVOSHLCSTP-----                                     | 260 |
| Clonorchis sinensis     | -----PRQV--ESPS-----EKCDND-----A-----                          | 308 |
| Fasciola hepatica       | --FQDNELLAT-----ESTQRQV--MDDTFTFNMTTENNNNNNS-----S-----        | 327 |
| Schistosoma mansoni     | -----HDEHVTKATIN-----                                          | 245 |
| Schistosoma japonicum   | --ITDTN-----IA-EFVQ-----LNDEHVVTIETS-----                      | 327 |
| Opisthorchis viverrini  | NLTNLMRASETNQPITH-----                                         | 281 |
| Homo sapiens            | I-----ALNGIVKLR-----KEVE-----                                  | 300 |
| Mus musculus            | I-----SLNGIVKLR-----KEVE-----                                  | 303 |
| Hymenolepis diminuta    | IM-----RTNREFTKR-----RKVYQMTFTGSRQSELTLMNGRSSEYG-----          | 347 |
| Hymenolepis microstoma  | VM-----RTNRPVKS-----RKVNIMHAFTRSQSDVMNGRSSEYS-----             | 347 |
| Echinococcus granulosus | VM-----RMNRPP--YR-----GRK-----INSSPSALGNNGRSLEVS-----          | 340 |
| Mesocostoides corti     | IR-----PPGRQDVR-----GKFCCLFASHRASTEITNGNLSLEQT-----            | 354 |
| Taenia asiatica         | SCQSPPKENPNISDCELSLPGVGLFSPRRPHGLFTKQHR---VSLHPTGNPKHRSPL      | 388 |
| Dugesia japonica        | -----NGQ--MH---L-----SLY-----SG-----                           | 270 |
| Schmidtea mediterranea  | -----NGQ--MH---L-----SLY-----SG-----                           | 271 |
| Clonorchis sinensis     | FVNSVP--SGPIPGP--VD-----T---TGPHPLT-----NGKSEEDR-----          | 339 |
| Fasciola hepatica       | FCPMIIREITENIGN--TSSQNF-VINPPVTELS-----NGHSYAKS-----           | 368 |
| Schistosoma mansoni     | -----NGV--KKDEDT-----NDICKAR-----E--YD-----                    | 264 |
| Schistosoma japonicum   | -----NGI--KNEGHI-----KAIPELK-----E--KD-----                    | 346 |

**Figure S1.** Multiple sequence alignment of amino acid sequences of serotonin 5-HT7 receptors in cestodes, trematodes and planarian species with the annotated genome sequences.
